# Supplementary material
Source: publisher figshare collection journal article supplement (https://gsajournals.figshare.com/ndownloader/files/14127260)
Supplement: Supplementary file 1 [file 14127260]

## Sheet: Sheet1
	Trinity	Khmer_Trinity	Trinity_DRAP	Oases_DRAP
Total transcripts	329131	273777	81327	60134
Contig N50 (bp)	1464	1250	1559	1888
Average contig (bp)	841.37	728.51	1102.25	1241.3
